# Supplementary material
Source: PubMed Central journal article supplement (PMC1895943)

**A**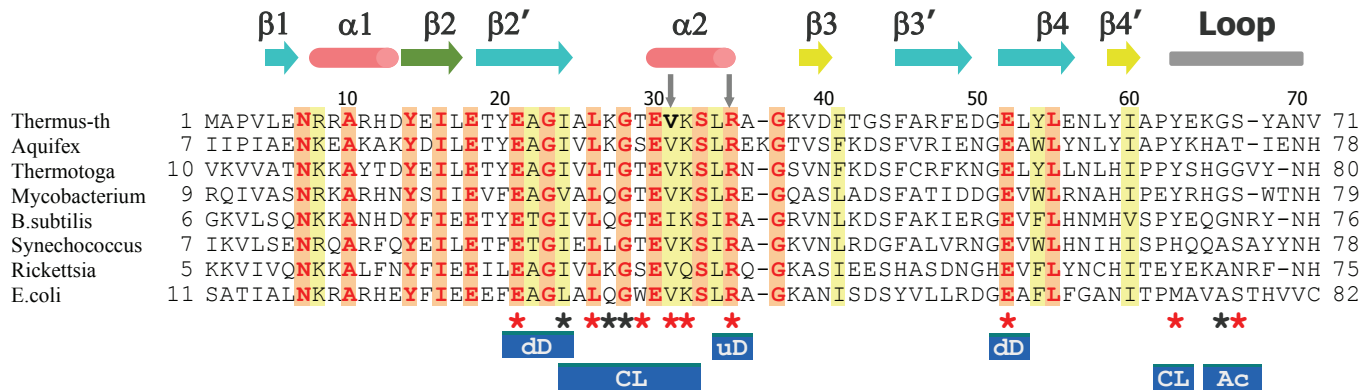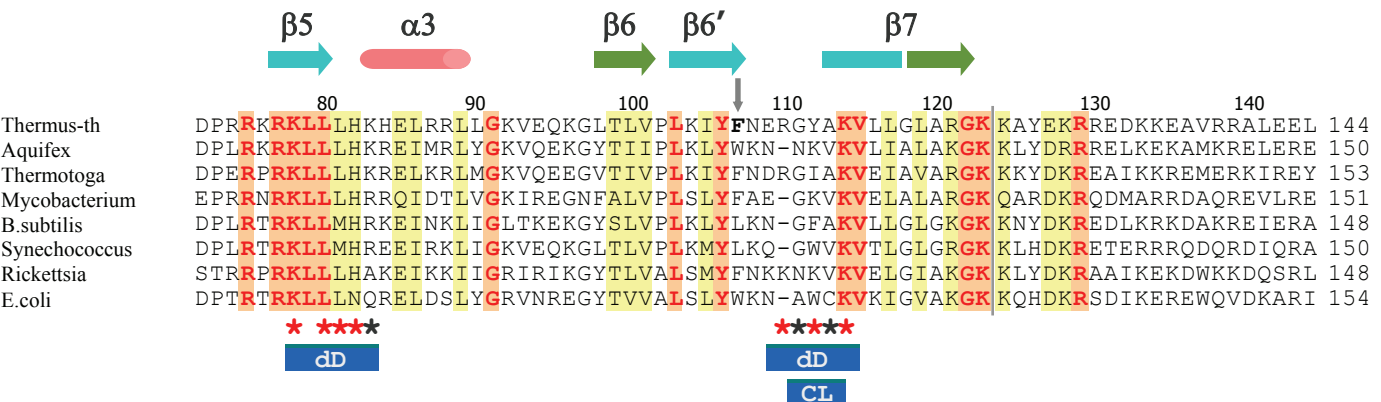**B**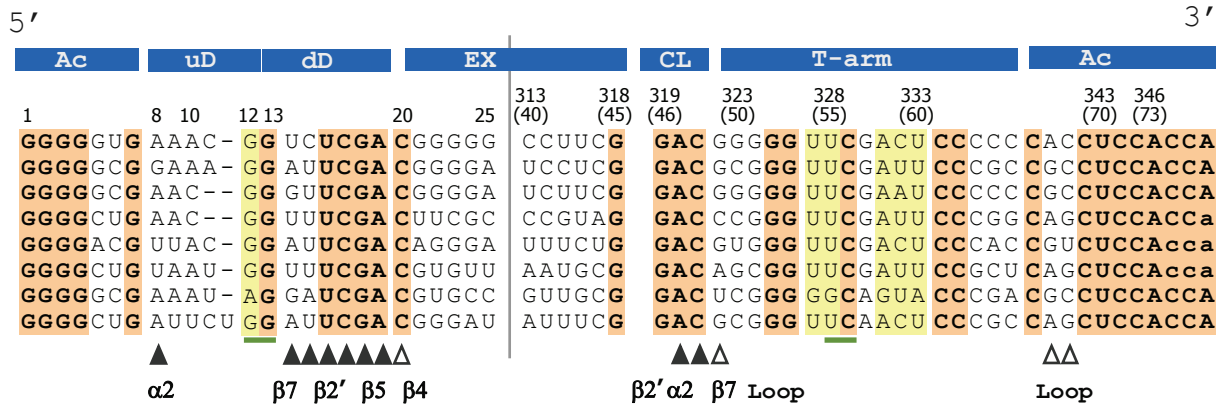

Supplement: pnas_0700402104_1.pdf [file pnas_0700402104_1.pdf]

**A**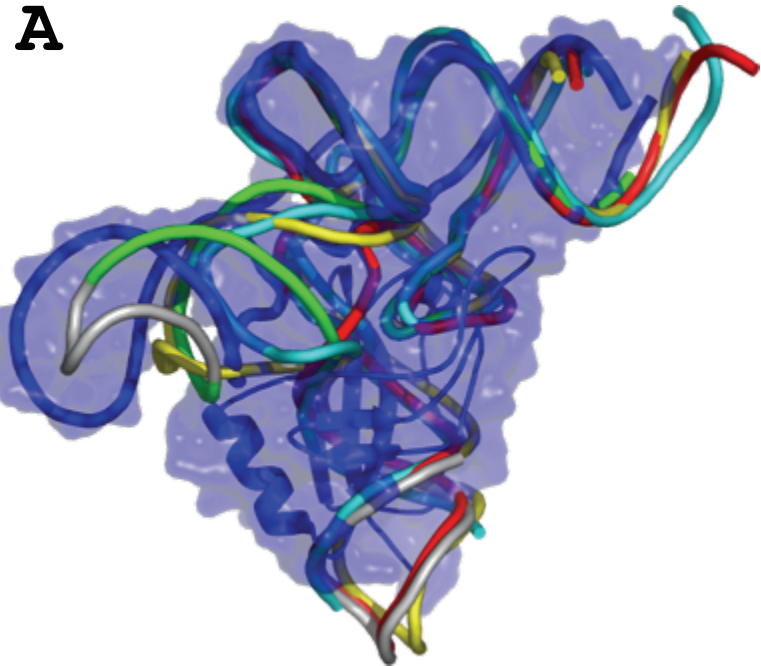**B**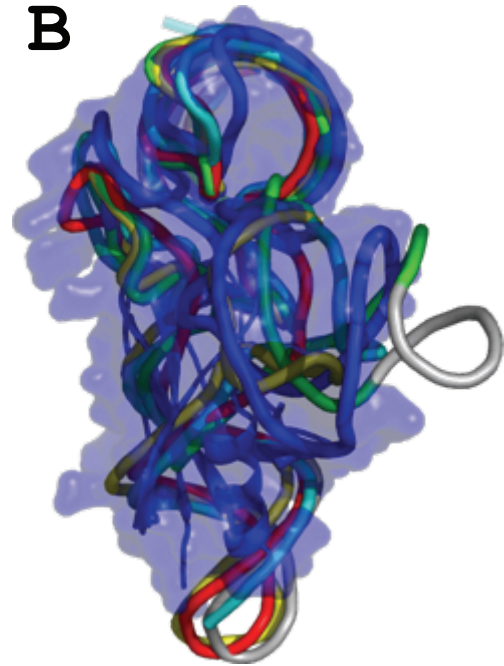**C**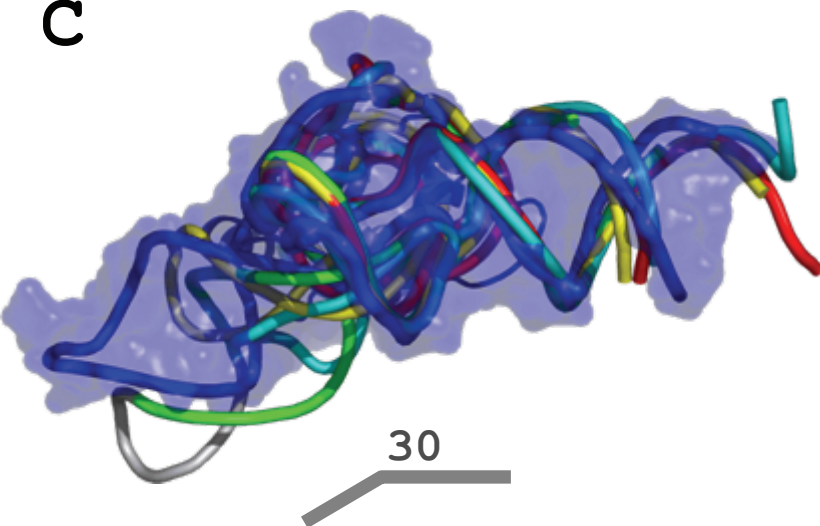**D**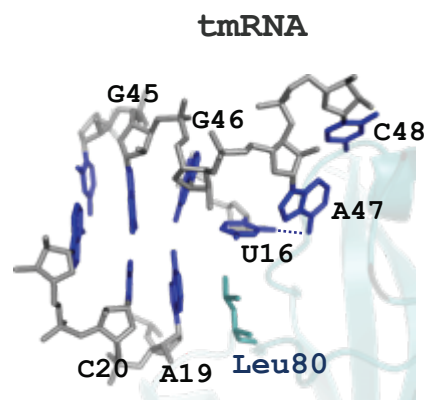

tmRNA and class-II tRNAs (Ser Tyr Leu)

Supplement: pnas_0700402104_2.pdf [file pnas_0700402104_2.pdf]
